# Supplementary material for: Solvothermal Synthesis Routes to Substituted Cerium Dioxide Materials
Source: MDPI journal article supplement (doi:10.3390/inorganics9060040), 2021-05-21
Supplement: s1 [file s1]

## Solvothermal Synthesis Routes to Substituted Cerium Dioxide Materials

James W. Annis, Janet M. Fisher, David Thompsett and Richard I. Walton

**Table S1: Summary of rare-earth substituted cerium dioxide materials prepared by solvothermal synthesis**

| Rare-Earth substituent | Composition $\text{Ce}_{1-x}\text{Ln}_x\text{O}_{2-\delta}$ | Reagents                                                                                                                                                     | Synthesis conditions                     | Particle Morphology                                                             | Properties Tested                                                                                           | Reference | Notes                                                      |
|------------------------|-------------------------------------------------------------|--------------------------------------------------------------------------------------------------------------------------------------------------------------|------------------------------------------|---------------------------------------------------------------------------------|-------------------------------------------------------------------------------------------------------------|-----------|------------------------------------------------------------|
| La                     | Not stated                                                  | $\text{Ce}(\text{NO}_3)_3 \cdot 6\text{H}_2\text{O}$<br>$\text{La}(\text{NO}_3)_3 \cdot 6\text{H}_2\text{O}$<br>urea<br>sodium citrate<br>dehydrate<br>water | 120 °C<br>36 h                           | 'broom-like' agglomerates of needles, length 5 $\mu\text{m}$ , diameter ~200 nm | (i) photo degradation of aqueous bisphenol<br><br>(ii) photocatalytic decomposition of gaseous acetaldehyde | [1]       | Also applied for Ln = Nd, Sm and Y and properties compared |
|                        | 5 wt%, 30 wt%<br>40 wt% La                                  | $(\text{NH}_4)_2[\text{Ce}(\text{NO}_3)_6]$<br>$\text{LaCl}_3 \cdot 7\text{H}_2\text{O}$<br>acetic acid<br>ethylene glycol<br>water                          | 180 °C 10 h<br>0.8 T<br>magnetic field   | nanoscale flakes or rods, with greater tendency for rod-shape in magnetic field | ferromagnetic response                                                                                      | [2]       |                                                            |
|                        | x = 0.1                                                     | $\text{Ce}(\text{NO}_3)_3 \cdot 6\text{H}_2\text{O}$<br>$\text{La}(\text{NO}_3)_3 \cdot 6\text{H}_2\text{O}$<br>11.5 M NaOH (aq)                             | 180 °C<br>24 hours                       | ~50 nm cubes                                                                    | hydroxyl radical scavenging activity                                                                        | [3]       |                                                            |
|                        | x = 0.00, 0.03, 0.06, and 0.09                              | $(\text{NH}_4)_2[\text{Ce}(\text{NO}_3)_6]$<br>$\text{La}_2\text{O}_3/\text{HNO}_3$<br>KOH(aq)                                                               | 100 °C<br>8 minutes<br>microwave heating | 6 – 12 nm spherical particles                                                   | photoluminescence                                                                                           | [4]       |                                                            |
|                        | $0 \leq x \leq 0.25$                                        | cerium (III) acetate hydrate                                                                                                                                 | 200 °C<br>3 hours                        | 0.4–5 $\mu\text{m}$ grain size after sintering                                  | oxide-ion conductivity of sintered powders                                                                  | [5]       | Also used for Nd, Sm, Gd                                   |

|    |              |                                                                                                                                                     |                                                |                                                                                      |                                                                                 |        |                                                                                                           |
|----|--------------|-----------------------------------------------------------------------------------------------------------------------------------------------------|------------------------------------------------|--------------------------------------------------------------------------------------|---------------------------------------------------------------------------------|--------|-----------------------------------------------------------------------------------------------------------|
|    |              | lanthanum (III)<br>acetate hydrate<br>triethylene glycol                                                                                            |                                                |                                                                                      |                                                                                 |        |                                                                                                           |
|    | x = 0.1      | CeCl <sub>3</sub> ·7H <sub>2</sub> O<br>LaCl <sub>3</sub><br>NaCl<br>12 M NaOH(aq)                                                                  | 180 °C<br>24 hours                             | nanowires ~ 5<br>nm diameter,<br>aspect ratio ~<br>500, with (110)<br>facets exposed | CO oxidation                                                                    | [6]    | Method<br>applied to<br>series of<br>lanthanides<br>La-Lu and<br>CO oxidation<br>optimised for<br>Ln = Nd |
|    | x = 0.091    | Ce(NO <sub>3</sub> ) <sub>3</sub> ·6H <sub>2</sub> O<br>La(NO <sub>3</sub> ) <sub>3</sub> ·6H <sub>2</sub> O<br>hexamethylenetetram<br>ine<br>water | 80 °C<br>45 minutes                            | 10–25 nm<br>cube-shaped,<br>stepped surface                                          | -                                                                               | [7]    |                                                                                                           |
|    | 0 < x < 0.1  | (NH <sub>4</sub> ) <sub>2</sub> [Ce(NO <sub>3</sub> ) <sub>6</sub> ]<br>La(NO <sub>3</sub> ) <sub>3</sub> ·6H <sub>2</sub> O<br>water               | Up to 400<br>°C;<br>continuous<br>flow reactor | ~7 nm isotropic<br>crystallites                                                      | -                                                                               | [8]    | method also<br>used for Pr                                                                                |
| Pr | 4, 8, 12% Pr | (NH <sub>4</sub> ) <sub>2</sub> [Ce(NO <sub>3</sub> ) <sub>6</sub> ]<br>Pr <sub>2</sub> O <sub>3</sub> /HNO <sub>3</sub><br>KOH(aq)                 | 100 °C<br>8 min<br>microwave                   | 5 to 15 nm<br>diameter<br>particles                                                  | photoluminescence                                                               | [9-10] |                                                                                                           |
|    | x = 0.5      | Ce(NO <sub>3</sub> ) <sub>3</sub> ·6H <sub>2</sub> O<br>Pr(NO <sub>3</sub> ) <sub>3</sub> ·6H <sub>2</sub> O<br>NaOH(aq)                            | 180 °C<br>25 hours                             | rods and<br>polyhedral<br>particles < 100<br>nm diameter                             | CO conversion,soot<br>combustion and total<br>oxidation of volatile<br>organics | [11]   | Increased Pr<br>content leads<br>to rod-shaped<br>particles                                               |
|    | x = 0.5      | Ce(NO <sub>3</sub> ) <sub>3</sub> ·6H <sub>2</sub> O<br>Pr(NO <sub>3</sub> ) <sub>3</sub> ·6H <sub>2</sub> O<br>NaOH(aq)                            | 180 °C<br>24 hours                             | rods, 100 nm<br>length, 20 nm<br>diameter<br>and cubes < 100<br>nm                   | CO, NO and soot<br>oxidations (with Pt<br>deposited on surface)                 | [12]   |                                                                                                           |

|    |                     |                                                                                                                                                                 |                               |                                                                       |                                                   |      |                                                                                           |
|----|---------------------|-----------------------------------------------------------------------------------------------------------------------------------------------------------------|-------------------------------|-----------------------------------------------------------------------|---------------------------------------------------|------|-------------------------------------------------------------------------------------------|
|    | 5, 10, 15, 20 mol % | Ce(NO <sub>3</sub> ) <sub>3</sub> ·6H <sub>2</sub> O<br>Pr(NO <sub>3</sub> ) <sub>3</sub> ·6H <sub>2</sub> O<br>NaOH(aq)                                        | 180 °C<br>24 hours            | nanocubes for ≤ 15 mol % Pr, nanocubes and nanorods for 20 mol % Pr   | oxidation of 3,3',5,5'-tetramethylbenzidine       | [13] |                                                                                           |
|    | 10, 25, 50 mol %    | Ce(NO <sub>3</sub> ) <sub>3</sub> ·6H <sub>2</sub> O<br>Pr(NO <sub>3</sub> ) <sub>3</sub> ·6H <sub>2</sub> O<br>NaOH(aq)                                        | 180 °C<br>24 hours            | nanocubes for < 25 mol % Pr, nanocubes and nanorods for > 25 mol % Pr | soot combustion                                   | [14] |                                                                                           |
|    | x = 0.05, 0.1, 0.2  | Ce(NO <sub>3</sub> ) <sub>3</sub> ·6H <sub>2</sub> O<br>Pr(NO <sub>3</sub> ) <sub>3</sub> ·6H <sub>2</sub> O<br>NaOH(aq)                                        | 220 °C<br>24 hours            | 20–120 nm nanocubes, with rods at high Pr content                     | -                                                 | [15] | Same method used for Sm, Gd , Tb Orientated attachment model for crystallisation proposed |
|    | x = 0.1, 0.2        | Ce(NO <sub>3</sub> ) <sub>3</sub> ·6H <sub>2</sub> O<br>Pr(NO <sub>3</sub> ) <sub>3</sub> ·6H <sub>2</sub> O<br>Urea<br>Water                                   | 120 °C<br>1 hour<br>microwave | 200 nm spheres consisting agglomerates of smaller particles           | Redox properties measured by heating in hydrogen  | [16] | Also used for Gd                                                                          |
| Nd | x ≤ 0.2             | (NH <sub>4</sub> ) <sub>2</sub> [Ce(NO <sub>3</sub> ) <sub>6</sub> ]<br>Nd(NO <sub>3</sub> ) <sub>3</sub> ·6H <sub>2</sub> O<br>Hexamethylenetetramine<br>Water | 90°C<br>1 hour                | < 10 nm diameter primary particles, agglomerated                      | -                                                 | [17] | Method also used for Eu                                                                   |
|    | x = 0.1, 0.2        | Ce(NO <sub>3</sub> ) <sub>3</sub> ·6H <sub>2</sub> O<br>Pr(NO <sub>3</sub> ) <sub>3</sub> ·6H <sub>2</sub> O<br>NH <sub>3</sub> (aq)                            | 80 °C<br>4 hours              | 4-8 nm particles                                                      | ionic conductivity measured from sintered powders | [18] | Precipitate first prepared and washed and then returned to autoclave with water;          |

|    |               |                                                                                                                                                                                                    |                                              |                                                         |                                                                    |      |                                                                                                                 |
|----|---------------|----------------------------------------------------------------------------------------------------------------------------------------------------------------------------------------------------|----------------------------------------------|---------------------------------------------------------|--------------------------------------------------------------------|------|-----------------------------------------------------------------------------------------------------------------|
|    |               |                                                                                                                                                                                                    |                                              |                                                         |                                                                    |      | also used for<br>Sm and Gd                                                                                      |
| Sm | x = 0.1, 0.2  | Cerium(III)acetate hydrate or $\text{Ce}(\text{NO}_3)_3 \cdot 6\text{H}_2\text{O}$<br>Samarium (III) acetate hydrate or $\text{Sm}(\text{NO}_3)_3 \cdot 6\text{H}_2\text{O}$<br>triethylene glycol | 200 °C<br>5 hours                            | Micron-sized flakes                                     | ionic conductivity measured from sintered powders                  | [19] |                                                                                                                 |
|    | x= 0.1 – 0.3  | $\text{CeCl}_3 \cdot 7\text{H}_2\text{O}$<br>$\text{Sm}_2\text{O}_3$<br>Polyvinylpyrrolidone<br>HCl<br>$\text{KClO}_3$<br>N,N-dimethylformamide<br>water                                           | 180 °C<br>4 hours                            | 60 nm diameter spheres of smaller primary particles     | CO oxidation                                                       | [20] |                                                                                                                 |
|    | x = 0.091     | $\text{Ce}(\text{NO}_3)_3 \cdot 6\text{H}_2\text{O}$<br>$\text{Sm}(\text{NO}_3)_3 \cdot 6\text{H}_2\text{O}$<br>$\text{NH}_3(\text{aq})$                                                           | 100 °C<br>followed by aging 0 °C for 45 days | 120–150 nm diameter and 1–1.5 $\mu\text{m}$ length rods | capacitance and ionic conductivity of deposited films of particles | [21] |                                                                                                                 |
|    | x = 0.1, 0.15 | $\text{Ce}(\text{NO}_3)_3 \cdot 6\text{H}_2\text{O}$<br>$\text{Sm}_2\text{O}_3/\text{HNO}_3$<br>$\text{NH}_3(\text{aq})$                                                                           | 130°C (3 bar) for 20 min<br>microwave        | ~ 7 nm cubes                                            | catalytic oxidation of $\alpha$ -bisabolol                         | [22] |                                                                                                                 |
|    | x = 0.1       | $\text{Ce}(\text{NO}_3)_3 \cdot 6\text{H}_2\text{O}$<br>$\text{Sm}(\text{NO}_3)_3 \cdot 6\text{H}_2\text{O}$<br>$\text{NaOH}(\text{aq})$                                                           | 180°C<br>24 hours                            | cubes 5 nm to 200 nm in size                            | -                                                                  | [23] | Doping of ceria with rare earth elements of preferred +3 valence is found not to lower the amount of reduced Ce |

|    |                 |                                                                                                                                                       |                                |                                                                                            |                                                                                                         |      |                                             |
|----|-----------------|-------------------------------------------------------------------------------------------------------------------------------------------------------|--------------------------------|--------------------------------------------------------------------------------------------|---------------------------------------------------------------------------------------------------------|------|---------------------------------------------|
|    |                 |                                                                                                                                                       |                                |                                                                                            |                                                                                                         |      | ions near the surfaces (EELS)               |
|    | x = 0.15        | Ce(NO <sub>3</sub> ) <sub>3</sub> ·6H <sub>2</sub> O<br>Sm(NO <sub>3</sub> ) <sub>3</sub> ·6H <sub>2</sub> O<br>KOH(aq)                               | 200 °C<br>30 min<br>microwave  | ~10 nm cuboid                                                                              | ionic conductivity of sintered and densified pellets prepared from powder                               | [24] | Gd and mixed Gd, Sm materials also prepared |
|    | x = 0.1         | Ce(NO <sub>3</sub> ) <sub>3</sub> ·6H <sub>2</sub> O<br>Sm(NO <sub>3</sub> ) <sub>3</sub> ·6H <sub>2</sub> O<br>NaOH(aq)                              | 160 °C 24 hours                | 8–20 nm cubes                                                                              | CO oxidation                                                                                            | [25] | Gd material also prepared                   |
|    | x = 0 – 0.1     | Ce(NO <sub>3</sub> ) <sub>3</sub> ·6H <sub>2</sub> O<br>Sm(NO <sub>3</sub> ) <sub>3</sub> ·6H <sub>2</sub> O<br>14 M NaOH(aq)                         | 100 or 180 °C<br>24 h          | Nanorods at 100 °C , 20 nm in diameter and average 200 nm in length<br>Nanocubes at 180 °C | photoluminescent properties, optimised in cube crystals                                                 | [26] |                                             |
| Eu | x = 0.03        | Ce(NO <sub>3</sub> ) <sub>3</sub> ·6H <sub>2</sub> O<br>Eu(NO <sub>3</sub> ) <sub>3</sub> ·6H <sub>2</sub> O<br>glycine<br>NaOH(aq)                   | 150 °C<br>10 hours             | 10–13 nm                                                                                   | photocatalytic degradation of congo red dye, and antibacterial properties                               | [27] |                                             |
|    | x = 0 – 0.4     | Ce(NO <sub>3</sub> ) <sub>3</sub> ·6H <sub>2</sub> O<br>Eu(NO <sub>3</sub> ) <sub>3</sub> ·6H <sub>2</sub> O<br>NaOH(aq)                              | 180 °C<br>3 hours<br>microwave | 20-70 nm cubes                                                                             | Reducibility measured by temperature programmed reduction                                               | [28] | Smaller crystals with higher Eu content     |
|    | 1–9 mol%        | Ce(NO <sub>3</sub> ) <sub>3</sub> ·6H <sub>2</sub> O<br>Eu(NO <sub>3</sub> ) <sub>3</sub> ·5H <sub>2</sub> O<br>epigallocatechin-3-gallate<br>ethanol | 120 - 180 °C<br>2 – 12 hours   | hierarchical nanostructures: flower-like intergrown plates, microns thickness              | photometric properties for visualization of latent fingerprints, and photodegradation of methylene blue | [29] |                                             |
|    | 0.1 to 2 mol %. | Ce(NO <sub>3</sub> ) <sub>3</sub> ·6H <sub>2</sub> O<br>Eu(NO <sub>3</sub> ) <sub>3</sub> ·5H <sub>2</sub> O                                          | 180 °C<br>12 hours             | 300–400 nm octahedra                                                                       | enhanced light-harvesting efficiency of                                                                 | [30] |                                             |

|    |                        |                                                                                                                                                                              |                                     |                                                    |                                                                                                 |      |                                                                                                                                  |
|----|------------------------|------------------------------------------------------------------------------------------------------------------------------------------------------------------------------|-------------------------------------|----------------------------------------------------|-------------------------------------------------------------------------------------------------|------|----------------------------------------------------------------------------------------------------------------------------------|
|    |                        | trisodiumphosphate<br>dodecahydrate<br>water                                                                                                                                 |                                     |                                                    | dye-sensitised solar<br>cells via<br>downconversion of UV<br>to visible light                   |      |                                                                                                                                  |
|    | 0.3–50 atom %          | Ce(NO <sub>3</sub> ) <sub>3</sub> ·6H <sub>2</sub> O<br>Eu(NO <sub>3</sub> ) <sub>3</sub> ·5H <sub>2</sub> O<br>NH <sub>3</sub> (aq)<br>ethanol                              | 180 °C<br>12 hours                  | pseudospherical<br>with diameter 5<br>- 10 nm      | luminescence                                                                                    | [31] | size decrease<br>with increased<br>europium<br>concentration                                                                     |
| Gd | x = 0.1                | Ce(NO <sub>3</sub> ) <sub>3</sub> ·6H <sub>2</sub> O<br>Gd(NO <sub>3</sub> ) <sub>3</sub> ·6H <sub>2</sub> O<br>6-amino hexanoic<br>acid<br><i>tert</i> -butylamine<br>water | 180 °C<br>24 hours                  | 10 nm cubes,<br>with {001}<br>facets               | composite with NiO<br>prepared as anode in<br>solid-oxide fuel cell<br>with superior resistance | [32] |                                                                                                                                  |
|    | x = 0.1, 0.2           | cerium (III) acetate<br>hydrate<br>gadolinium (III)<br>acetate hydrate<br>triethylene glycol                                                                                 | 200 °C<br>3 hours                   | 10-40 nm (from<br>XRD peak<br>broadening)          | oxide-ion conductivity<br>of sintered powders                                                   | [33] |                                                                                                                                  |
|    | x = 0.10,<br>0.15,0.20 | (NH <sub>4</sub> ) <sub>2</sub> [Ce(NO <sub>3</sub> ) <sub>6</sub> ]<br>Gd(NO <sub>3</sub> ) <sub>3</sub> ·6H <sub>2</sub> O<br>hexamethylenetetram<br>ine<br>water          | 180°C<br>5, 30, 60 min<br>microwave | 3-4 nm<br>spherical                                | -                                                                                               | [34] | HMTA<br>hydrolysis,<br>which occurs<br>upon heating<br>of aqueous<br>HMTA<br>solutions to<br>form<br>formaldehyde<br>and ammonia |
|    | x = 0.1                | CeCl <sub>3</sub> ·7H <sub>2</sub> O<br>GdCl <sub>3</sub> ·6H <sub>2</sub> O<br>octadecylamine<br>ethanol                                                                    | 150 °C<br>72 hours                  | ~24 nm by<br>XRD peak<br>broadening,<br>aggregated | soot oxidation                                                                                  | [35] |                                                                                                                                  |

|  |              |                                                                                                                                                                            |                                                                        |                                                                |                                                                                                                     |         |                                                                                                                   |
|--|--------------|----------------------------------------------------------------------------------------------------------------------------------------------------------------------------|------------------------------------------------------------------------|----------------------------------------------------------------|---------------------------------------------------------------------------------------------------------------------|---------|-------------------------------------------------------------------------------------------------------------------|
|  |              | ethylenediamine                                                                                                                                                            |                                                                        | nanocrystals from TEM                                          |                                                                                                                     |         |                                                                                                                   |
|  |              |                                                                                                                                                                            |                                                                        |                                                                |                                                                                                                     | [36]    | Gadolinium doped ceria on graphene cathode with enhanced cycle stability for non-aqueous lithium-oxygen batteries |
|  | x = 0.2      | Ce(NO <sub>3</sub> ) <sub>3</sub> ·6H <sub>2</sub> O<br>Gd(NO <sub>3</sub> ) <sub>3</sub> ·6H <sub>2</sub> O<br>KOH(aq)                                                    | 396°C for ~29 s followed by two down-stream stages at 290°C, and 285°C | 6 - 40 nm with polyhedral or octahedral shape, depending on pH | processed into inks for inkjet printing and printed onto substrates suitable for solid-oxide fuel cell electrolytes | [37]    | continuous flow-type apparatus: reagent solution and supercritical water mixed to induce crystallisation          |
|  | x = 0.1      | Ce(NO <sub>3</sub> ) <sub>3</sub> ·6H <sub>2</sub> O<br>Gd(NO <sub>3</sub> ) <sub>3</sub> ·6H <sub>2</sub> O<br>NH <sub>3</sub> (aq)<br>pH adjusted with HCl, water or KOH | 140°C<br>1 day                                                         | 10 nm cuboids                                                  | ionic conductivity of sintered pellets                                                                              | [38]    |                                                                                                                   |
|  | x = 0.1, 0.2 | (NH <sub>4</sub> ) <sub>2</sub> [Ce(NO <sub>3</sub> ) <sub>6</sub> ]<br>Gd(NO <sub>3</sub> ) <sub>3</sub> ·6H <sub>2</sub> O<br>tetramethyl ammonium hydroxide             | 240 °C<br>1 h                                                          | 5 nm nanoparticles agglomerated into micron-sized particles    | <i>in vivo</i> toxicity in rats studied                                                                             | [39-40] |                                                                                                                   |

|    |                       |                                                                                                                                                                              |                                           |                                                            |                                                       |      |                                                                           |
|----|-----------------------|------------------------------------------------------------------------------------------------------------------------------------------------------------------------------|-------------------------------------------|------------------------------------------------------------|-------------------------------------------------------|------|---------------------------------------------------------------------------|
|    |                       | Water                                                                                                                                                                        |                                           |                                                            |                                                       |      |                                                                           |
|    | x = 0.2               | Ce(SO <sub>4</sub> ) <sub>2</sub> (aq)<br>Gd(NO <sub>3</sub> ) <sub>3</sub> (aq)<br>N(CH <sub>3</sub> ) <sub>4</sub> OH<br>N(CH <sub>3</sub> ) <sub>4</sub> HCO <sub>3</sub> | 125–150 °C<br>6–24 h                      | 4 nm cubiodal                                              | -                                                     | [41] | tetramethyl ammonium capping proposed to avoid agglomeration and ripening |
|    | x = 0.05              | Ce (NO <sub>3</sub> ) <sub>3</sub> ·6H <sub>2</sub> O<br>Gd(NO <sub>3</sub> ) <sub>3</sub> (aq)<br>water/ethylene glycol 1:7 vol:vol                                         | 350 or 380 °C<br>10 min                   | Spherical agglomerates of nanosheets 20–40 nm in thickness | CO oxidation                                          | [42] |                                                                           |
|    | x = 0 or 0.15         | Ce(NO <sub>3</sub> ) <sub>3</sub> ·6H <sub>2</sub> O<br>Gd(NO <sub>3</sub> ) <sub>3</sub> ·6H <sub>2</sub> O<br>NH <sub>3</sub> (aq)                                         | 250 °C<br>6–22 h<br>neutral pH            | 8-15 nm                                                    | photoluminescence                                     | [43] | Hydrothermal ripening of precipitate. Also used for Y                     |
|    | x = 0.2               | Ce (NO <sub>3</sub> ) <sub>3</sub> ·6H <sub>2</sub> O<br>Gd(NO <sub>3</sub> ) <sub>3</sub> (aq)<br>NH <sub>3</sub> (aq)                                                      | 130 °C<br>30 min<br>microwave             | nanorods<br>50–500 nm length<br>20–60 nm diameter          | reforming of methanol                                 | [44] | microwave heating accelerates the formation of nanorods                   |
| Tb | x = 0.1 or 0.2        | Ce (NO <sub>3</sub> ) <sub>3</sub> ·6H <sub>2</sub> O<br>Tb(NO <sub>3</sub> ) <sub>3</sub> (aq)<br>urea<br>water                                                             | 120 °C<br>1 hour<br>microwave             | 200 nm spheres of agglomerated 10 nm particles             | redox properties on hydrogen reduction/ air oxidation | [45] | Tb <sup>4+</sup> formation on reoxidation                                 |
|    | x = 0.1, 0.2 and 0.3) | Ce (NO <sub>3</sub> ) <sub>3</sub> ·6H <sub>2</sub> O<br>Tb(NO <sub>3</sub> ) <sub>3</sub> (aq)<br>urea<br>water                                                             | microwave treated: 800 W for 3 x 1 minute | not stated                                                 | red ceramic pigments                                  | [46] | also mixed Tb,Y materials prepared                                        |

|    |                                    |                                                                                                                                                                                                   |                                                   |                                                                                              |                                                                                                                        |      |                                                                                     |
|----|------------------------------------|---------------------------------------------------------------------------------------------------------------------------------------------------------------------------------------------------|---------------------------------------------------|----------------------------------------------------------------------------------------------|------------------------------------------------------------------------------------------------------------------------|------|-------------------------------------------------------------------------------------|
| Dy | x = 0.1                            | Ce(NO <sub>3</sub> ) <sub>3</sub> ·6H <sub>2</sub> O<br>Dy(NO <sub>3</sub> ) <sub>3</sub> ·nH <sub>2</sub> O<br>NH <sub>3</sub> (aq)                                                              | 120 °C 12 h                                       | ~25 nm from<br>XRD peak<br>broadening                                                        | temperature<br>programmed reduction<br>(H <sub>2</sub> ) and CO oxidation                                              | [47] | All Ln, La-Yb<br>studied by<br>same method                                          |
| Ho | x = 0.1                            | Ce(NO <sub>3</sub> ) <sub>3</sub> ·6H <sub>2</sub> O<br>Ho(NO <sub>3</sub> ) <sub>3</sub> ·5H <sub>2</sub> O<br>NH <sub>3</sub> (aq)                                                              | 120 °C 12 h                                       | ~25 nm from<br>XRD peak<br>broadening                                                        | temperature<br>programmed reduction<br>(H <sub>2</sub> ) and CO oxidation                                              | [47] | All Ln, La-Yb<br>studied by<br>same method                                          |
| Er | x = 0.091                          | Ce(NO <sub>3</sub> ) <sub>3</sub> ·6H <sub>2</sub> O<br>Er(OCOCH <sub>3</sub> ) <sub>3</sub> ·4H <sub>2</sub> O<br>formic acid<br>methanol                                                        | 300 °C<br>10 minutes                              | mesoporous<br>spheres, ~ 150<br>nm diameter                                                  | luminescence                                                                                                           | [48] | Supercritical<br>conditions;<br>also mixed<br>Er, Yb                                |
|    | x = 0.01-0.007                     | Ce(NO <sub>3</sub> ) <sub>3</sub> ·6H <sub>2</sub> O<br>Er(NO <sub>3</sub> ) <sub>3</sub> ·5H <sub>2</sub> O<br>LiNO <sub>3</sub><br>Na <sub>3</sub> PO <sub>4</sub> ·12H <sub>2</sub> O<br>water | 180 °C for<br>12 h                                | octahedra with<br>50 to 100 nm<br>edges                                                      | Vis-NIR emission<br>under optical up-and<br>down-conversion<br>excitation; enhanced<br>emission when Li is<br>present. | [49] | Morphology<br>maintained on<br>800 °C<br>annealing.<br>Li co-doped?                 |
|    | 0, 0.2, 0.3, 0.4<br>and 0.5 wt% Er | Ce (NO <sub>3</sub> ) <sub>3</sub> (aq)<br>Er(NO <sub>3</sub> ) <sub>3</sub> (aq)<br>0.1 M NaOH                                                                                                   | 120 °C<br>8 h                                     | Agglomerated<br>particles, 10s of<br>nm in<br>dimension                                      | Photodegradation of<br>Rhodamine-B,<br>and antimicrobial<br>performance                                                | [50] |                                                                                     |
|    | x ≤ 0.5                            | Ce (NO <sub>3</sub> ) <sub>3</sub> (aq)<br>Er(NO <sub>3</sub> ) <sub>3</sub> (aq)<br>~9 M NaOH                                                                                                    | 220 °C<br>24 h<br>Or 220 °C<br>6 h<br>(microwave) | Cube-shaped<br>particles, 10s of<br>nm in<br>dimension, with<br>bimodal size<br>distribution | -                                                                                                                      | [51] | Er(OH) <sub>3</sub><br>impurity<br>found for x<br>>0.3 in<br>microwave<br>synthesis |
|    | x = 0.0625 – 0.5                   | Ce (NO <sub>3</sub> ) <sub>3</sub> (aq)<br>Er(NO <sub>3</sub> ) <sub>3</sub> (aq)<br>Na <sub>3</sub> PO <sub>4</sub> ·12H <sub>2</sub> O                                                          | 190 °C<br>12 hours                                | 200 – 300 nm<br>octahedral                                                                   | photoluminescence                                                                                                      | [52] |                                                                                     |

|    |              |                                                                                                                                                                                          |                                                                                   |                                                                                                                                  |                                                                           |           |                                                                                                           |
|----|--------------|------------------------------------------------------------------------------------------------------------------------------------------------------------------------------------------|-----------------------------------------------------------------------------------|----------------------------------------------------------------------------------------------------------------------------------|---------------------------------------------------------------------------|-----------|-----------------------------------------------------------------------------------------------------------|
|    |              | water                                                                                                                                                                                    |                                                                                   |                                                                                                                                  |                                                                           |           |                                                                                                           |
| Tm | x = 0.1      | Ce(NO <sub>3</sub> ) <sub>3</sub> ·6H <sub>2</sub> O<br>Tm(NO <sub>3</sub> ) <sub>3</sub> ·5H <sub>2</sub> O<br>NH <sub>3</sub> (aq)                                                     | 120 °C 12 h                                                                       | ~25 nm from<br>XRD peak<br>broadening                                                                                            | temperature<br>programmed reduction<br>(H <sub>2</sub> ) and CO oxidation | [47]      | All Ln, La-Yb<br>studied by<br>same method                                                                |
| Yb | x = 0 - 0.50 | Ce(NO <sub>3</sub> ) <sub>3</sub> ·6H <sub>2</sub> O<br>Yb(NO <sub>3</sub> ) <sub>3</sub> ·6H <sub>2</sub> O<br>NaOH, or<br>Na <sub>3</sub> PO <sub>4</sub> ·12H <sub>2</sub> O<br>water | 220 or<br>170 °C<br>24 or 12 h<br>(or 220 or<br>170 °C, 3<br>hours,<br>microwave) | ~ 10 -15 nm<br>cubes (from<br>NaOH)<br><br>~10 - 50 nm<br>octahedral from<br>Na <sub>3</sub> PO <sub>4</sub> ·12H <sub>2</sub> O | soot oxidation                                                            | [53] [54] | YbO(OH)<br>impurity in x<br>= 0.5<br>materials                                                            |
| Lu | x = 0.1      | CeCl <sub>3</sub> ·7H <sub>2</sub> O<br>LuCl <sub>3</sub><br>NaCl<br>12 M NaOH(aq)                                                                                                       | 180 °C<br>24 hours                                                                | nanowires ~ 5<br>nm diameter,<br>aspect ratio ~<br>500, with (110)<br>facets exposed                                             | CO oxidation                                                              | [6]       | Method<br>applied to<br>series of<br>lanthanides<br>La-Lu and<br>CO oxidation<br>optimised for<br>Ln = Nd |
| Y  | x = 0.091    | Ce(NO <sub>3</sub> ) <sub>3</sub> ·6H <sub>2</sub> O<br>Y(NO <sub>3</sub> ) <sub>3</sub> ·6H <sub>2</sub> O<br>polystyrene<br>microspheres<br>water                                      | 150 °C<br>24 h                                                                    | 200 nm hollow<br>spheres                                                                                                         | Photocatalytic activity<br>for acetaldehyde<br>decomposition              | [55]      |                                                                                                           |
|    | x = 0.08     | Ce(NO <sub>3</sub> ) <sub>3</sub> ·6H <sub>2</sub> O<br>Y(NO <sub>3</sub> ) <sub>3</sub> ·6H <sub>2</sub> O<br>Na <sub>3</sub> PO <sub>4</sub><br>water                                  | 100–250 °C<br>for 12–96 h                                                         | 200 nm<br>octahedral with<br>nanorod coating<br>with increasing<br>Na <sub>3</sub> PO <sub>4</sub>                               | Photocatalytic activity<br>for acetaldehyde<br>decomposition              | [56]      |                                                                                                           |
|    | x = 0.11     | Ce(NO <sub>3</sub> ) <sub>3</sub> ·6H <sub>2</sub> O<br>Y(NO <sub>3</sub> ) <sub>3</sub> ·6H <sub>2</sub> O                                                                              | 110°C                                                                             | nanorods                                                                                                                         | Photocatalytic<br>degradation of dyes                                     | [57]      | Increasing<br>Y(OH) <sub>3</sub>                                                                          |

|  |  |          |      |                                                 |  |  |                                            |
|--|--|----------|------|-------------------------------------------------|--|--|--------------------------------------------|
|  |  | NaOH(aq) | 24 h | 100±37 nm in length and 10.9±2.8 nm in diameter |  |  | impurity with higher attempted Y inclusion |
|--|--|----------|------|-------------------------------------------------|--|--|--------------------------------------------|

## References

1. Xu, B.; Yang, H.; Zhang, Q.; Yuan, S.; Xie, A.; Zhang, M.; Ohno, T. Design and Synthesis of Sm, Y, La and Nd-doped CeO<sub>2</sub> with a broom-like hierarchical structure: a photocatalyst with enhanced oxidation performance. *ChemCatChem* **2020**, *12*, 2638-2646.
2. Yang, Z.; Yin, Z.; Zhao, Z.; Yu, J.; Li, J.; Ren, Z.; Yu, G. Morphologies and magnetic properties of La-doped CeO<sub>2</sub> nanoparticles by the solvothermal method in a low magnetic field. *Mater. Chem. Phys.* **2020**, *240*, 122148.
3. Fernandez-Garcia, S.; Jiang, L.; Tinoco, M.; Hungria, A. B.; Han, J.; Blanco, G.; Calvino, J. J.; Chen, X. Enhanced Hydroxyl Radical Scavenging Activity by Doping Lanthanum in Ceria Nanocubes. *J. Phys. Chem. C* **2016**, *120*, 1891-1901.
4. Deus, R. C.; Cortés, J. A.; Ramirez, M. A.; Ponce, M. A.; Andres, J.; Rocha, L. S. R.; Longo, E.; Simões, A. Z. Photoluminescence properties of cerium oxide nanoparticles as a function of lanthanum content. *Mater. Res. Bull.* **2015**, *70*, 416-423.
5. Dönmez, G.; Sarıboğa, V.; Gürkaynak Altınçekiç, T.; Öksüzömer, M. A. F. Polyol Synthesis and Investigation of Ce<sub>1-x</sub>RE<sub>x</sub>O<sub>2-x/2</sub> (RE = Sm, Gd, Nd, La, 0 ≤ x ≤ 0.25) Electrolytes for IT-SOFCs. *J. Am. Ceram. Soc.* **2015**, *98*, 501-509.
6. Ke, J.; Xiao, J.-W.; Zhu, W.; Liu, H.; Si, R.; Zhang, Y.-W.; Yan, C.-H. Dopant-Induced Modification of Active Site Structure and Surface Bonding Mode for High-Performance Nanocatalysts: CO Oxidation on Capping-free (110)-oriented CeO<sub>2</sub>:Ln (Ln = La–Lu) Nanowires. *J. Am. Chem. Soc.* **2013**, *135*, 15191-15200.
7. Basu, J.; Divakar, R.; Winterstein, J. P.; Carter, C. B. Low-temperature and ambient-pressure synthesis and shape evolution of nanocrystalline pure, La-doped and Gd-doped CeO<sub>2</sub>. *Appl. Surf. Sci.* **2010**, *256*, 3772-3777.
8. Słostowski, C.; Marre, S.; Bassat, J.-M.; Aymonier, C. Synthesis of cerium oxide-based nanostructures in near- and supercritical fluids. *J. Supercrit. Fluids* **2013**, *84*, 89-97.
9. Cabral, A. C.; Cavalcante, L. S.; Deus, R. C.; Longo, E.; Simões, A. Z.; Moura, F. Photoluminescence properties of praseodymium doped cerium oxide nanocrystals. *Ceram. Int.* **2014**, *40*, 4445-4453.
10. Cristina de Oliveira, R.; Cabral, L.; Cabral, A. C.; Almeida, P. B.; Tibaldi, N.; Sambrano, J. R.; Simões, A. Z.; Macchi, C. E.; Moura, F.; Marques, G. E.; Ponce, M. A.; Longo, E. Charge transfer in Pr-Doped cerium oxide: Experimental and theoretical investigations. *Mater. Chem. Phys.* **2020**, *249*, 122967.
11. Sartoretti, E.; Martini, F.; Piumetti, M.; Bensaid, S.; Russo, N.; Fino, D. Nanostructured Equimolar Ceria-Praseodymia for Total Oxidations in Low-O<sub>2</sub> Conditions. *Catalysts* **2020**, *10*, 165.
12. Andana, T.; Piumetti, M.; Bensaid, S.; Veyre, L.; Thieuleux, C.; Russo, N.; Fino, D.; Quadrelli, E. A.; Pirone, R. Nanostructured equimolar ceria-praseodymia for NO<sub>x</sub>-assisted soot oxidation: Insight into Pr dominance over Pt nanoparticles and metal–support interaction. *Appl. Catal. B: Environ.* **2018**, *226*, 147-161.

13. Jiang, L.; Fernandez-Garcia, S.; Tinoco, M.; Yan, Z.; Xue, Q.; Blanco, G.; Calvino, J. J.; Hungria, A. B.; Chen, X. Improved Oxidase Mimetic Activity by Praseodymium Incorporation into Ceria Nanocubes. *ACS Appl. Mater. Inter.* **2017**, *9*, 18595-18608.
14. Andana, T.; Piumetti, M.; Bensaid, S.; Russo, N.; Fino, D.; Pirone, R. Nanostructured ceria-praseodymia catalysts for diesel soot combustion. *Appl. Catal. B: Environ.* **2016**, *197*, 125-137.
15. Mendiuk, O.; Nawrocki, M.; Kepinski, L. The synthesis of  $Ce_{1-x}Ln_xO_{2-y}$  ( $Ln=Pr, Sm, Gd, Tb$ ) nanocubes by hydrothermal methods. *Ceram. Int.* **2016**, *42*, 1998-2012.
16. Muñoz, F. F.; Acuña, L. M.; Albornoz, C. A.; Leyva, A. G.; Baker, R. T.; Fuentes, R. O. Redox properties of nanostructured lanthanide-doped ceria spheres prepared by microwave assisted hydrothermal homogeneous co-precipitation. *Nanoscale* **2015**, *7*, 271-281.
17. Polezhaeva, O. S.; Ivanov, V. K.; Dolgoplova, E. A.; Baranchikov, A. E.; Shcherbakov, A. B.; Tret'yakov, Y. D. Synthesis of Nanocrystalline Solid Solutions  $Ce_{1-x}R_xO_2$  ( $R = Nd, Eu$ ) by the Homogeneous Hydrolysis Method. *Dokl. Chem.* **2010**, *433*, 183-185.
18. Kim, G.; Lee, N.; Kim, K.-B.; Kim, B.-K.; Chang, H.; Song, S.-J.; Park, J.-Y. Various synthesis methods of aliovalent-doped ceria and their electrical properties for intermediate temperature solid oxide electrolytes. *Int. J. Hydrog. Energy* **2013**, *38*, 1571-1587.
19. Karaca, T.; Altınçekiç, T. G.; Faruk Öksüzömer, M. Synthesis of nanocrystalline samarium-doped  $CeO_2$  (SDC) powders as a solid electrolyte by using a simple solvothermal route. *Ceram. Int.* **2010**, *36*, 1101-1107.
20. Deng, T.; Zhang, C.; Xiao, Y.; Xie, A.; Pang, Y. U. E.; Yang, Y. One-step synthesis of samarium-doped ceria and its CO catalysis. *Bull. Mater. Sci.* **2015**, *38*, 1149-1154.
21. Karl Chinnu, M.; Vijai Anand, K.; Mohan Kumar, R.; Alagesan, T.; Jayavel, R. Synthesis and enhanced electrochemical properties of  $Sm:CeO_2$  nanostructure by hydrothermal route. *Mater. Lett.* **2013**, *113*, 170-173.
22. Silva, A. G. M.; Rodrigues, T. S.; Dias, A.; Fajardo, H. V.; Gonçalves, R. F.; Godinho, M.; Robles-Dutenhefner, P. A.  $Ce_{1-x}Sm_xO_{1.9-\delta}$  nanoparticles obtained by microwave-assisted hydrothermal processing: an efficient application for catalytic oxidation of  $\alpha$ -bisabolol. *Catal. Sci. Tech.* **2014**, *4*, 814-821.
23. Bhatta, U. M.; Reid, D.; Sakthivel, T.; Sayle, T. X. T.; Sayle, D.; Molinari, M.; Parker, S. C.; Ross, I. M.; Seal, S.; Möbus, G. Morphology and Surface Analysis of Pure and Doped Cuboidal Ceria Nanoparticles. *J. Phys. Chem. C* **2013**, *117*, 24561-24569.
24. Prado-Gonjal, J.; Schmidt, R.; Espíndola-Canuto, J.; Ramos-Alvarez, P.; Morán, E. Increased ionic conductivity in microwave hydrothermally synthesized rare-earth doped ceria  $Ce_{1-x}RE_xO_{2-(x/2)}$ . *J. Power Sources* **2012**, *209*, 163-171.
25. Wang, Z.; Wang, Q.; Liao, Y.; Shen, G.; Gong, X.; Han, N.; Liu, H.; Chen, Y. Comparative Study of  $CeO_2$  and Doped  $CeO_2$  with Tailored Oxygen Vacancies for CO Oxidation. *ChemPhysChem* **2011**, *12*, 2763-2770.
26. Yoshida, Y.; Fujihara, S. Shape-Controlled Synthesis and Luminescent Properties of  $CeO_2:Sm^{3+}$  Nanophosphors. *Eur. J. Inorg. Chem.* **2011**, *2011*, 1577-1583.
27. Gnanam, S.; Gajendiran, J.; Ramana Ramya, J.; Ramachandran, K.; Gokul Raj, S. Glycine-assisted hydrothermal synthesis of pure and europium doped  $CeO_2$  nanoparticles and their structural, optical, photoluminescence, photocatalytic and antibacterial properties. *Chem. Phys. Lett.* **2021**, *763*, 138217.
28. Bezkravnyi, O.; Małecka, M. A.; Lisiecki, R.; Ostroushko, V.; Thomas, A. G.; Gorantla, S.; Kepinski, L. The effect of Eu doping on the growth, structure and red-ox activity of ceria nanocubes. *CrystEngComm* **2018**, *20*, 1698-1704.
29. Deepthi, N. H.; Darshan, G. P.; Basavaraj, R. B.; Prasad, B. D.; Nagabhushana, H. Large-scale controlled bio-inspired fabrication of 3D  $CeO_2:Eu^{3+}$  hierarchical structures for evaluation of highly sensitive visualization of latent fingerprints. *Sens. Actuators B Chem.* **2018**, *255*, 3127-3147.

30. Roh, J.; Hwang, S. H.; Jang, J. Dual-Functional CeO<sub>2</sub>:Eu<sup>3+</sup> Nanocrystals for Performance-Enhanced Dye-Sensitized Solar Cells. *ACS Appl. Mater. Inter.* **2014**, *6*, 19825-19832.
31. Thorat, A. V.; Ghoshal, T.; Carolan, P.; Holmes, J. D.; Morris, M. A. Defect Chemistry and Vacancy Concentration of Luminescent Europium Doped Ceria Nanoparticles by the Solvothermal Method. *J. Phys. Chem. C* **2014**, *118*, 10700-10710.
32. Yamamoto, K.; Hashishin, T.; Matsuda, M.; Qiu, N.; Tan, Z.; Ohara, S. High-performance Ni nanocomposite anode fabricated from Gd-doped ceria nanocubes for low-temperature solid-oxide fuel cells. *Nano Energy* **2014**, *6*, 103-108.
33. Öksüzömer, M. A. F.; Dönmez, G.; Sariboğa, V.; Altınçekiç, T. G. Microstructure and ionic conductivity properties of gadolinia doped ceria (Gd<sub>x</sub>Ce<sub>1-x</sub>O<sub>2-x/2</sub>) electrolytes for intermediate temperature SOFCs prepared by the polyol method. *Ceram. Int.* **2013**, *39*, 7305-7315.
34. Dolgoplova, E. A.; Ivanova, O. S.; Ivanov, V. K.; Sharikov, F. Y.; Baranchikov, A. E.; Shcherbakov, A. B.; Trietyakov, Y. D. Microwave-hydrothermal synthesis of gadolinium-doped nanocrystalline ceria in the presence of hexamethylenetetramine. *Russ. J. Inorg. Chem.* **2012**, *57*, 1303-1307.
35. Anantharaman, A. P.; Gadiyar, H. J.; Surendran, M.; Rao, A. S.; Dasari, H. P.; Dasari, H.; Babu, G. U. B. Effect of synthesis method on structural properties and soot oxidation activity of gadolinium-doped ceria. *Chem. Papers* **2018**, *72*, 3179-3188.
36. Jiang, Y.; Zou, L.; Cheng, J.; Huang, Y.; Wang, Z.; Chi, B.; Pu, J.; Li, J. Gadolinium doped ceria on graphene cathode with enhanced cycle stability for non-aqueous lithium-oxygen batteries. *J. Power Sources* **2018**, *400*, 1-8.
37. Xu, Y.; Farandos, N.; Rosa, M.; Zielke, P.; Esposito, V.; Vang Hendriksen, P.; Jensen, S. H.; Li, T.; Kelsall, G.; Kiebach, R. Continuous hydrothermal flow synthesis of Gd-doped CeO<sub>2</sub> (GDC) nanoparticles for inkjet printing of SOFC electrolytes. *Int. J. Appl. Ceram. Technol.* **2018**, *15*, 315-327.
38. Dell'Agli, G.; Spiridigliozzi, L.; Marocco, A.; Accardo, G.; Ferone, C.; Cioffi, R. Effect of the Mineralizer Solution in the Hydrothermal Synthesis of Gadolinium-Doped (10% mol Gd) Ceria Nanopowders. *J. Appl. Biomater. Func. Mater.* **2016**, *14*, 189-196.
39. Dunnick, K. M.; Pillai, R.; Pisane, K. L.; Stefaniak, A. B.; Sabolsky, E. M.; Leonard, S. S. The Effect of Cerium Oxide Nanoparticle Valence State on Reactive Oxygen Species and Toxicity. *Biol. Trace Elem. Res* **2015**, *166*, 96-107.
40. Dunnick, K. M.; Morris, A. M.; Badding, M. A.; Barger, M.; Stefaniak, A. B.; Sabolsky, E. M.; Leonard, S. S. Evaluation of the effect of valence state on cerium oxide nanoparticle toxicity following intratracheal instillation in rats. *Nanotox.* **2016**, *10*, 992-1000.
41. Sato, K.; Arai, M.; Valmalette, J.-C.; Abe, H. Surface Capping-Assisted Hydrothermal Growth of Gadolinium-Doped CeO<sub>2</sub> Nanocrystals Dispersible in Aqueous Solutions. *Langmuir* **2014**, *30*, 12049-12056.
42. Kempaiah, D. M.; Yin, S.; Sato, T. A facile and quick solvothermal synthesis of 3D microflower CeO<sub>2</sub> and Gd:CeO<sub>2</sub> under subcritical and supercritical conditions for catalytic applications. *CrystEngComm* **2011**, *13*, 741-746.
43. Palard, M.; Balencie, J.; Maguer, A.; Hochepped, J.-F. Effect of hydrothermal ripening on the photoluminescence properties of pure and doped cerium oxide nanoparticles. *Mater. Chem. Phys.* **2010**, *120*, 79-88.
44. Godinho, M.; de F. Gonçalves, R.; Leite, E. R.; Raubach, C. W.; Carreño, N. L. V.; Probst, L. F. D.; Longo, E.; Fajardo, H. V. Gadolinium-doped cerium oxide nanorods: novel active catalysts for ethanol reforming. *J. Mater. Sci.* **2010**, *45*, 593-598.
45. Acuña, L. M.; Muñoz, F. F.; Albornoz, C. A.; Leyva, A. G.; Baker, R. T.; Fuentes, R. O. Nanostructured terbium-doped ceria spheres: effect of dopants on their physical and chemical properties under reducing and oxidizing conditions. *J. Mater. Chem. A* **2015**, *3*, 16120-16131.
46. Llusar, M.; Vitásková, L.; Šulcová, P.; Tena, M. A.; Badenes, J. A.; Monrós, G. Red ceramic pigments of terbium-doped ceria prepared through classical and non-conventional coprecipitation routes. *J. Eur. Ceram. Soc.* **2010**, *30*, 37-52.

47. Sohn, Y. Lanthanide (III) (La, Pr, Nd, Sm, Eu, Gd, Tb, Dy, Ho, Er, Tm, and Yb) Ions Loaded in CeO<sub>2</sub> Support; Fundamental Natures, Hydrogen Reduction, and CO Oxidation Activities. *Appl. Sci. Conv. Tech.* **2019**, 28, 35-40.
48. Wang, P.; Kobi, K. Synthetic versatility of nanoparticles: A new, rapid, one-pot, single-step synthetic approach to spherical mesoporous (metal) oxide nanoparticles using supercritical alcohols. *Pure Appl. Chem.* **2014**, 86, 785-800.
49. Yang, Y.; Cong, Y.; Dong, D. P.; Xiao, Y.; Shang, J. Y.; Tong, Y.; Zhang, H. M.; He, M.; Zhang, J. H. Structural and excitation dependent emission properties of octahedral CeO<sub>2</sub>:Er<sup>3+</sup> nanocrystal. *J. Lumin.* **2019**, 213, 427-432.
50. Maria Magdalane, C.; Kaviyarasu, K.; Raja, A.; Arularasu, M. V.; Mola, G. T.; Isaev, A. B.; Al-Dhabi, N. A.; Arasu, M. V.; Jeyaraj, B.; Kennedy, J.; Maaza, M. Photocatalytic decomposition effect of erbium doped cerium oxide nanostructures driven by visible light irradiation: Investigation of cytotoxicity, antibacterial growth inhibition using catalyst. *J. Photochem. Photobiol. B* **2018**, 185, 275-282.
51. Mendiuk, O.; Kepinski, L. Synthesis of Ce<sub>1-x</sub>Er<sub>x</sub>O<sub>2-y</sub> nanoparticles by the hydrothermal method: Effect of microwave radiation on morphology and phase composition. *Ceram. Int.* **2014**, 40, 14833-14843.
52. Bo, Q.; Wang, J. Structural and optical properties of erbium doped ceria nanoparticles synthesized by hydrothermal method. *Spectrosc. Lett.* **2021**, 54, 165-170.
53. Małecka, M. A.; Kraszkiewicz, P.; Bezkrvnyi, O. Catalysis by shapely nanocrystals of the Ce<sub>1-x</sub>Yb<sub>x</sub>O<sub>2-x/2</sub> mixed oxides — Synthesis and phase stability. *Mater. Char.* **2019**, 155, 109796.
54. Małecka, M. A. Characterization and thermal stability of Yb-doped ceria prepared by methods enabling control of the crystal morphology. *CrystEngComm* **2017**, 19, 6199-6207.
55. Xu, B.; Zhang, Q.; Yuan, S.; Liu, S.; Zhang, M.; Ohno, T. Synthesis and photocatalytic performance of yttrium-doped CeO<sub>2</sub> with a hollow sphere structure. *Catal. Today* **2017**, 281, 135-143.
56. Xu, B.; Zhang, Q.; Yuan, S.; Zhang, M.; Ohno, T. Morphology control and photocatalytic characterization of yttrium-doped hedgehog-like CeO<sub>2</sub>. *Appl. Catal. B: Environ.* **2015**, 164, 120-127.
57. Liyanage, A. D.; Perera, S. D.; Tan, K.; Chabal, Y.; Balkus, K. J. Synthesis, Characterization, and Photocatalytic Activity of Y-Doped CeO<sub>2</sub> Nanorods. *ACS Catal.* **2014**, 4, 577-584.
